# Supplementary material for: Role of phosphorylase and amylase in accelerated ripening of mutant banana 'Basrai-10Gy'
Source: Royal Society of Chemistry journal article supplement (doi:10.1039/d2nr06718h), 2004-03-03
Supplement: d2nr06718h1.pdf [file d2nr06718h1.pdf]

**Electronic Supporting Information**

**Production of a promising modular proteinaceous self-assembled delivery system  
for vaccination**

*Chao Pan,<sup>‡a</sup> Jingqin Ye,<sup>‡a</sup> Sen Zhang,<sup>b</sup> Xiang Li,<sup>a</sup> Yixin Shi,<sup>a</sup> Yan Guo,<sup>a</sup> Kangfeng  
Wang,<sup>a,c</sup> Peng Sun,<sup>a,d</sup> Jun Wu,<sup>\*a</sup> Hengliang Wang<sup>\*a</sup> and Li Zhu<sup>\*a</sup>*

<sup>a</sup> State Key Laboratory of Pathogen and Biosecurity, Beijing Institute of Biotechnology, Beijing,  
100071, PR China

<sup>b</sup> State Key Laboratory of Pathogen and Biosecurity, Beijing Institute of Microbiology and  
Epidemiology, Academy of Military Medical Sciences, Beijing, 100071, PR China

<sup>c</sup> College of Life Science, Hebei University, Baoding, 071002, PR China

<sup>d</sup> School of Medicine, Tsinghua University, Beijing, 100084, PR China

\*Corresponding author: E-mail: jewly54@bmi.ac.cn, wanghl@bmi.ac.cn, junwu1969@163.com

<sup>‡</sup>These authors contributed equally to this work.

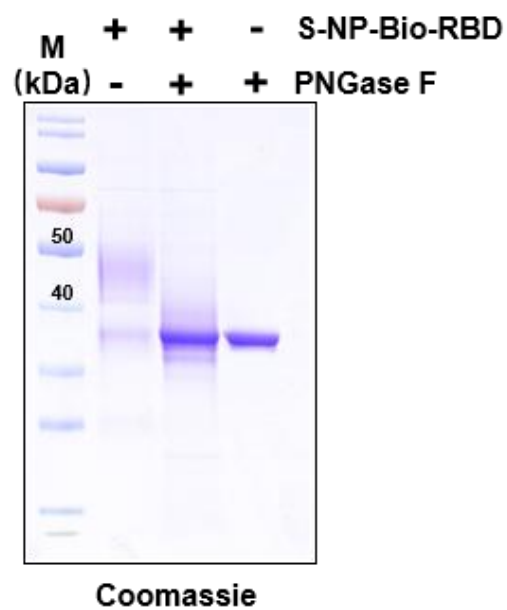

**Fig. S1** SDS-PAGE analysis of S-NP that was incubated with or without PNGase F.

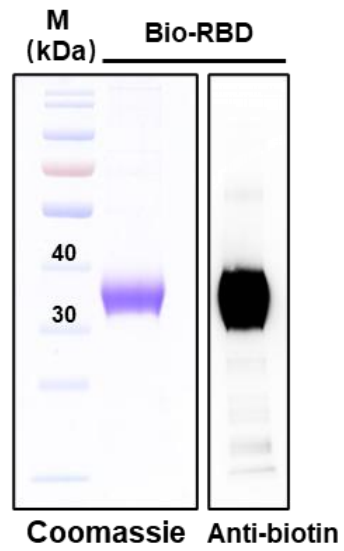

27 **Fig. S2** Bio-RBD was analyzed by Coomassie blue staining and western blotting  
28 using HRP-labeled streptavidin (SA) after SDS-PAGE separation.  
29

30

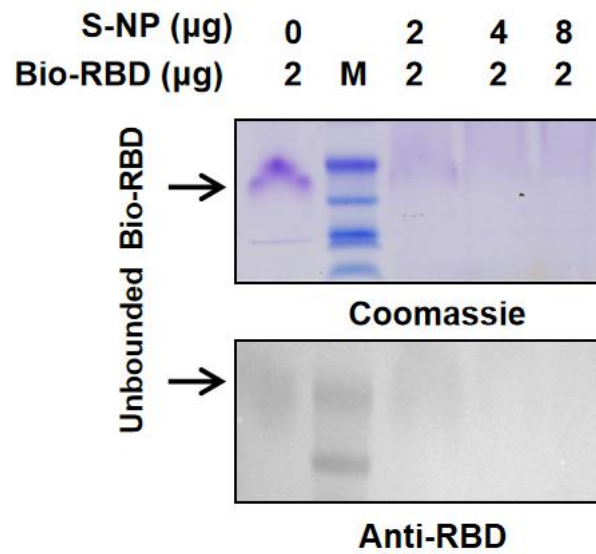

31

32 **Fig. S3** Analysis of the binding between S-NP and Bio-RBD under different  
33 proportions after incubation at 37°C for 1 h by Coomassie blue staining and western  
34 blotting (M: marker).

35

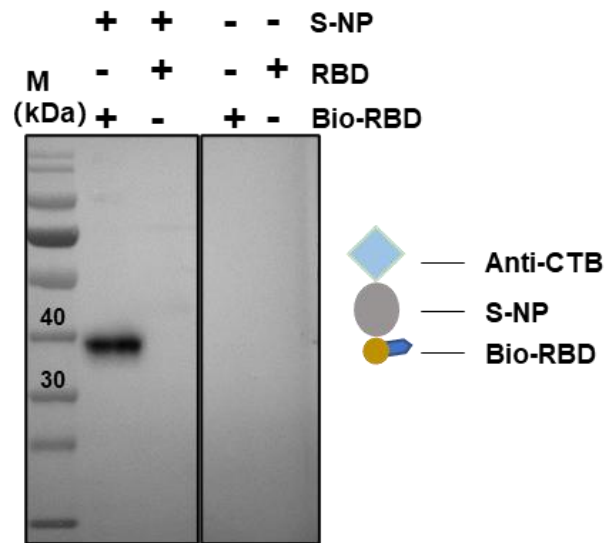

36

37 **Fig. S4** RBD and Bio-RBD were separated by SDS-PAGE individually, and then

38 transferred to PVDF membranes. After incubation with S-NP and buffer at 37 °C for

39 one hour, the two membranes were incubated with anti-CTB antibody and

40 HRP-labeled secondary antibody successively to analyze the connection of Biotin and

41 mSA.

42

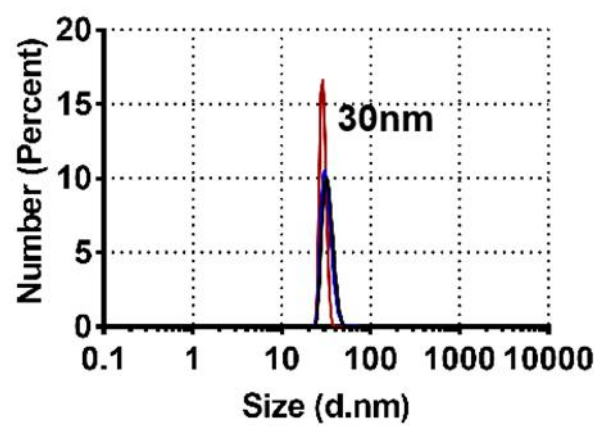

Fig. S5 S-NP-Bio-RBD was analyzed by DLS.

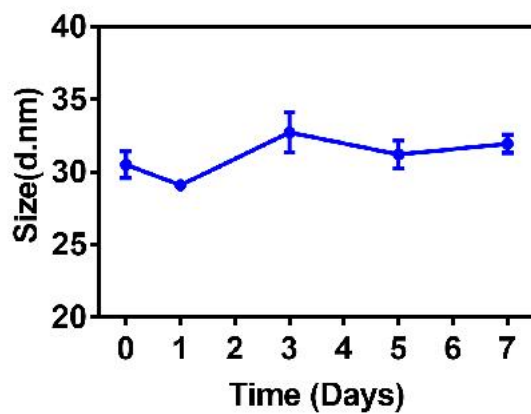

47 **Fig. S6** Stability analysis of S-NP-Bio-RBD. S-NP-Bio-RBD solution was detected  
48 by DLS when incubated at 37 °C for different time periods.

49

50

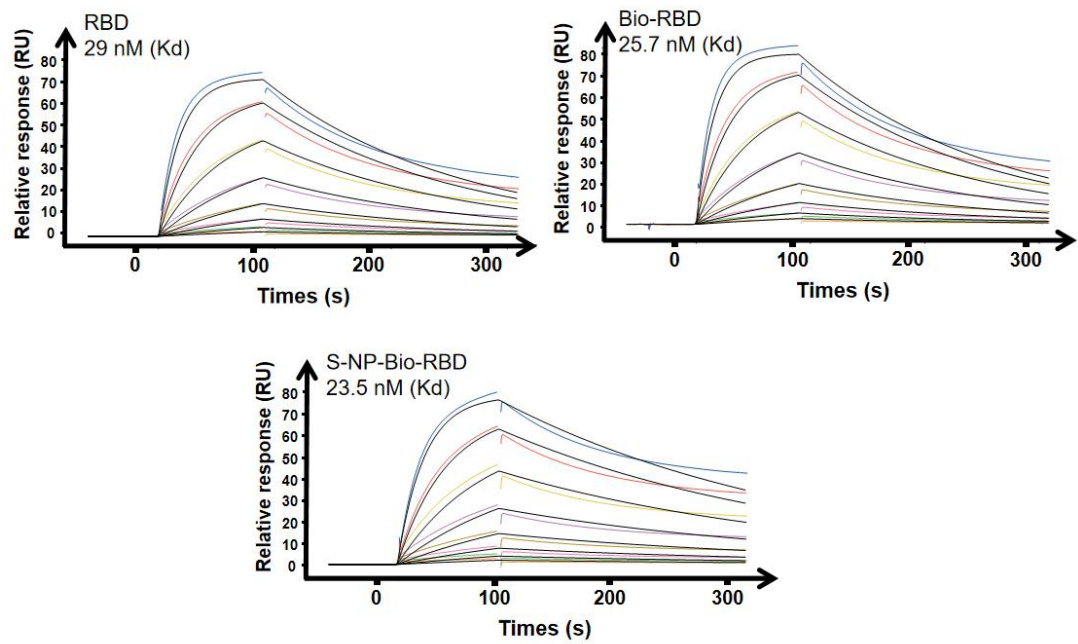

51

52 **Fig. S7.** Measurement of affinity between ACE2 and RBD, Bio-RBD and  
53 S-NP-Bio-RBD by surface plasmon resonance. Different color lines indicate the  
54 different concentrations of RBD.

55



56

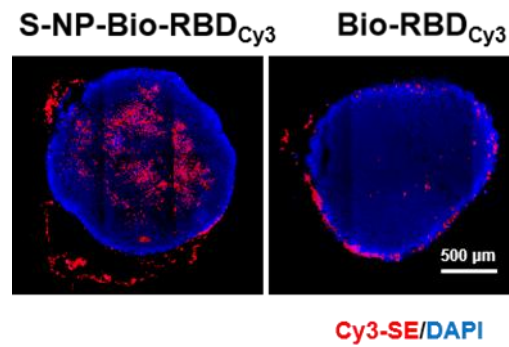

57

58 **Fig. S8** Cy3-labeled Bio-RBD (Bio-RBD<sub>Cy3</sub>) was coupled with S-NP  
59 (S-NP-Bio-RBD<sub>Cy3</sub>). Balb/c mice were subcutaneously injected with  
60 S-NP-Bio-RBD<sub>Cy3</sub> or Bio-RBD<sub>Cy3</sub>, and immunofluorescence was performed to  
61 analyze the accumulation of antigen in dLNs 24 h after immunization.

62

63

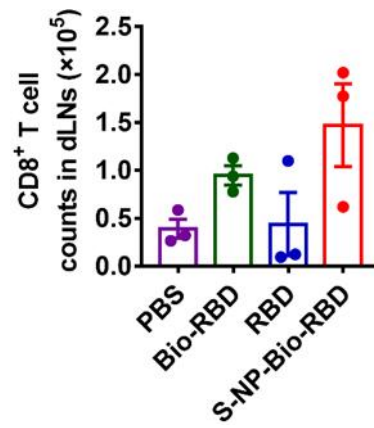

64

65 **Fig. S9** CD8<sup>+</sup> T cell counts in dLNs three days after vaccination (n = 3).

66

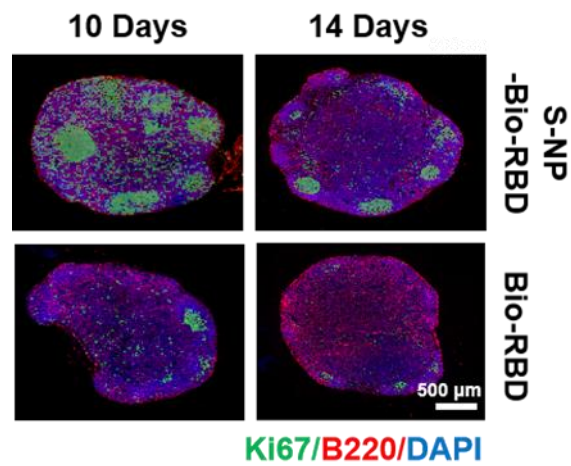

67

68 **Fig. S10** Immunofluorescence was performed to analyze the formation of germinal  
 69 center in dLNs at different time points. Bar = 500 μm.

70

71

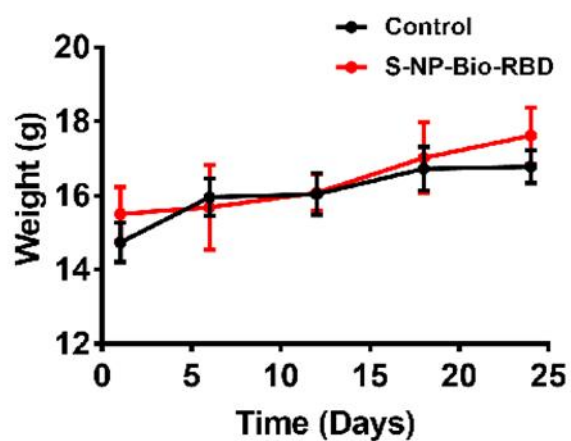

72

73 **Fig. S11** Body weight of the mice was measured after immunization with

74 S-NP-Bio-RBD (25  $\mu$ g RBD per mouse) for one month.

75

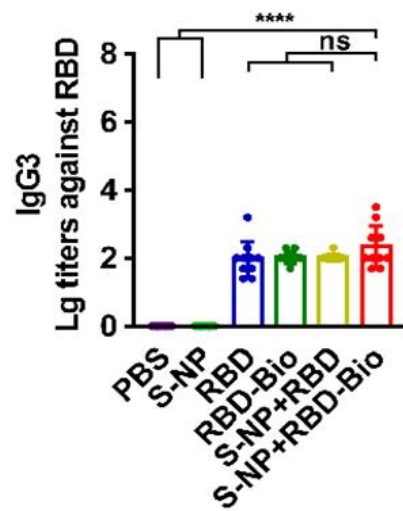

77 **Fig. S12** IgG3 titers against RBD were measured in the serum of Balb/c mice  
 78 immunized with S-NP, RBD, Bio-RBD, S-NP+RBD, and S-NP-Bio-RBD after the  
 79 third immunization. \*\*\*\*  $p < 0.0001$ , ns: no significant.

80
